# Supplementary material for: Impulsivity, suicidal thoughts, psychological distress, and religiosity in adolescents and young adults
Source: Frontiers journal article supplement (doi:10.3389/fpsyt.2023.1137651), 2023-04-05
Supplement: Data_Sheet_1.pdf [file Data_Sheet_1.pdf]

# Scale of Suicidal Ideation

## Original references:

Beck AT Kovacs M Weissman A. Assessment of suicidal intention: The scale of suicide ideation. *J Consult Clin Psychology*. 1979; 47: 343-352.

Beck AT Steer RA Rantieri WF. Scale for suicide ideation: Psychometric properties of a self-report version. *J Clin Psychology*. 1988; 44: 499-505.

---

The scale of suicidal ideation consists of 19 items, scored 0 to 2, which can be used to evaluate a patient's suicidal intentions. It can also be used to monitor a patient's response to interventions over time.

---

| Item                                     | Response                                             | Points |
|------------------------------------------|------------------------------------------------------|--------|
| 1. Wish to live                          | moderate to strong                                   | 0      |
|                                          | weak                                                 | 1      |
|                                          | none                                                 | 2      |
| 2. Wish to die                           | none                                                 | 0      |
|                                          | weak                                                 | 1      |
|                                          | moderate to strong                                   | 2      |
| 3. Reasons for living/dying              | for living outweigh for dying                        | 0      |
|                                          | about equal                                          | 1      |
|                                          | for dying outweigh for living                        | 2      |
| 4. Desire to make active suicide attempt | none                                                 | 0      |
|                                          | weak                                                 | 1      |
|                                          | moderate to strong                                   | 2      |
| 5. Passive suicidal desire               | would take precautions to save life                  | 0      |
|                                          | would leave life/death to chance                     | 1      |
|                                          | would avoid steps necessary to save or maintain life | 2      |
| 6. Duration of suicide ideation/wish     | brief fleeting periods                               | 0      |
|                                          | longer periods                                       | 1      |
|                                          | continuous (chronic) or almost continuous            | 2      |
| 7. Frequency of suicide ideation         | rare occasional                                      | 0      |
|                                          | intermittent                                         | 1      |
|                                          | persistent or continuous                             | 2      |
| 8. Attitude toward ideation/wish         | rejecting                                            | 0      |
|                                          | ambivalent indifferent                               | 1      |
|                                          | accepting                                            | 2      |

# Scale of Suicidal Ideation

| Item                                                             | Response                                                            | Points |
|------------------------------------------------------------------|---------------------------------------------------------------------|--------|
| 9. Control over suicidal action/acting-out wish                  | has sense of control                                                | 0      |
|                                                                  | unsure of control                                                   | 1      |
|                                                                  | has no sense of control                                             | 2      |
| 10. Deterrents to active attempt                                 | would not attempt because of a deterrent                            | 0      |
|                                                                  | some concern about deterrents                                       | 1      |
|                                                                  | minimal or no concern about deterrents                              | 2      |
| 11. Reason for contemplated attempt                              | to manipulate the environment; get attention or revenge             | 0      |
|                                                                  | combination of desire to manipulate and to escape                   | 1      |
|                                                                  | escape surcease solve problems                                      | 2      |
| 12. Method: specificity or planning of contemplated attempt      | not considered                                                      | 0      |
|                                                                  | considered but details not worked out                               | 1      |
|                                                                  | details worked out and well-formulated                              | 2      |
| 13. Method: availability or opportunity for contemplated attempt | method not available or no opportunity                              | 0      |
|                                                                  | method would take time or effort; opportunity not readily available | 1      |
|                                                                  | method and opportunity available                                    | 2      |
|                                                                  | future opportunity or availability of method anticipated            | 2      |
| 14. Sense of "capability" to carry out attempt                   | no courage too weak afraid incompetent                              | 0      |
|                                                                  | unsure of courage or competence                                     | 1      |
|                                                                  | sure of competence courage                                          | 2      |
| 15. Expectancy/anticipation of actual attempt                    | no                                                                  | 0      |
|                                                                  | uncertain not sure                                                  | 1      |
|                                                                  | yes                                                                 | 2      |
| 16. Actual preparation for contemplated attempt                  | none                                                                | 0      |

[Print this page](#)

page 3 of 3

# Scale of Suicidal Ideation

| Item                                                 | Response                                      | Points |
|------------------------------------------------------|-----------------------------------------------|--------|
| 17. Suicide note                                     | none                                          | 0      |
|                                                      | started but not completed; only thought about | 1      |
|                                                      | completed                                     | 2      |
| 18. Final acts in anticipation of death              | none                                          | 0      |
|                                                      | thought about or made some arrangements       | 1      |
|                                                      | made definite plans or completed arrangements | 2      |
| 19. Deception or concealment of contemplated suicide | revealed ideas openly                         | 0      |

---

## Scoring:

The total score for the 19 items is calculated.

Minimum score = 0

Maximum score = 38

Higher scores indicate greater suicidal ideation

---

[Close this window](#)

obtained from <http://www.psy-world.com>
